# Supplementary material for: Synthesis of Estrone Heterodimers and Evaluation of Their In Vitro Antiproliferative Activity
Source: MDPI journal article supplement (doi:10.3390/ijms25084274), 2024-04-12

# Synthesis of Estrone Heterodimers and Evaluation of Their In Vitro Antiproliferative Activity

Characterization data of the reported heterodimers (11–14)

3-[[1-(3-benzyloxy-17 $\beta$ -hydroxy-13 $\alpha$ -estra-1,3,5(10)-trien-16 $\alpha$ -yl)-1H-1,2,3-triazol-4-yl]methoxy]-13 $\alpha$ -hydroxymethyl-14 $\beta$ -propyl-des-D-estra-1,3,5(10)-triene (11)

11 was obtained as a white solid (159 mg, 87%). Mp 104–108 °C,  $R_f$  = 0.80<sup>A</sup>. Anal. Calcd. For C<sub>47</sub>H<sub>59</sub>N<sub>3</sub>O<sub>4</sub>: C, 77.33; H, 8.15. Found: C, 77.41; H, 8.20. <sup>1</sup>H NMR  $\delta$  ppm (CDCl<sub>3</sub>): 0.77 and 1.28 (2xs, 2x3H, 18-H<sub>3</sub> and 18'-H<sub>3</sub>); 0.92 (t, 1H,  $J$  = 6.8 Hz, 16a'-H<sub>3</sub>); 2.80–2.85 (overlapping multiplets, 2x2H, 6-H<sub>2</sub> and 6'-H<sub>2</sub>); 3.33 and 3.51 (2xm, 2x1H, 17'-H<sub>2</sub>); 4.14 (d, 1H,  $J$  = 8.1 Hz, 17-H); 4.74 (m, 1H, 16-H); 5.03 (s, 2H, benzyl-OCH<sub>2</sub>); 5.17 (s, 2H, OCH<sub>2</sub>); 6.69 and 6.71 (2xd, 2x1H,  $J$  = 2.2 Hz, 4-H and 4'-H); 6.78 and 6.81 (2xdd, 2x1H,  $J$  = 8.6 Hz,  $J$  = 2.2 Hz, 2-H and 2'-H); 7.16 and 7.21 (2xd, 2x1H,  $J$  = 8.6 Hz, 1-H and 1'-H); 7.32 (t, 1H,  $J$  = 7.3 Hz, 4''-H); 7.38 (t, 2H, 3''- and 5''-H), 7.43 (d, 2H,  $J$  = 7.3 Hz, 2''- and 6''-H); 7.70 (s, 1H, C=CH), <sup>13</sup>C NMR  $\delta$  ppm 14.7 and 16.0 and 28.7 (C-18 and C-18' and C-16a'); 25.0; 26.4; 26.9; 27.4; 27.5; 28.9; 30.2; 30.7; 31.2; 31.9; 35.6; 37.4; 38.7; 41.0; 41.7; 42.1; 43.5; 45.2; 48.6; 62.0 (OCH<sub>2</sub>); 66.1 (C-16); 69.9 (benzyl-OCH<sub>2</sub>); 71.3 (C-17'); 85.2 (C-17); 112.4 and 113.0 (C-2 and C-2'); 114.2 and 114.3 (C-4 and C-4'); 122.4 (C=C<sub>17</sub>); 126.6 and 127.7 (C-1 and C-1'); 127.4 (2C: C-2'' and C-6''); 127.8 (C-4''); 128.5 (2C: C-3'' and C-5''); 133.5 and 133.8 (C-10 and C-10'); 137.2 (C-1''); 137.5 and 138.1 (C-5 and C-5'); 144.1 (C=C<sub>17</sub>); 156.1 and 156.6 (C-3 and C-3').

ESI-HRMS:  $m/z$ : 730.45636 [M+H]<sup>+</sup> (C<sub>47</sub>H<sub>60</sub>N<sub>3</sub>O<sub>4</sub> requires 730.45783 [M+H]<sup>+</sup>).

3-[[1-(3-benzyloxy-17 $\alpha$ -hydroxy-13 $\alpha$ -estra-1,3,5(10)-trien-16 $\beta$ -yl)-1H-1,2,3-triazol-4-yl]methoxy]-13 $\alpha$ -hydroxymethyl-14 $\beta$ -propyl-des-D-estra-1,3,5(10)-triene (12)

12 was obtained as a white solid (171 mg, 94%). Mp 98–102 °C,  $R_f$  = 0.76<sup>A</sup>. Anal. Calcd. For C<sub>47</sub>H<sub>59</sub>N<sub>3</sub>O<sub>4</sub>: C, 77.33; H, 8.15. Found: C, 77.43; H, 8.21. <sup>1</sup>H NMR  $\delta$  ppm (CDCl<sub>3</sub>): 0.77 and 1.26 (2xs, 2x3H, 18-H<sub>3</sub> and 18'-H<sub>3</sub>); 0.91 (t, 1H,  $J$  = 6.8 Hz, 16a'-H<sub>3</sub>); 3.33 and 3.51 (2xd, 2x1H,  $J$  = 10.9 Hz, 17'-H<sub>2</sub>); 4.52 (d, 1H,  $J$  = 8.2 Hz, 17-H); 4.77 (m, 1H, 16-H); 5.03 (s, 2H, benzyl-OCH<sub>2</sub>); 5.16 (s, 2H, OCH<sub>2</sub>); 6.71 (2xd, 2x1H,  $J$  = 2.2 Hz, 4-H and 4'-H); 6.78 (2xdd, 2x1H,  $J$  = 8.6 Hz,  $J$  = 2.2 Hz, 2-H and 2'-H); 7.20 (2xd, 2x1H,  $J$  = 8.6 Hz, 1-H and 1'-H); 7.31 (t, 1H,  $J$  = 7.3 Hz, 4''-H); 7.38 (t, 2H, 3''- and 5''-H), 7.42 (d, 2H,  $J$  = 7.3 Hz, 2''- and 6''-H); 7.66 (s, 1H, C=CH), <sup>13</sup>C NMR  $\delta$  ppm 14.7 and 16.0 and 23.0 (C-18 and C-18' and C-16a'); 25.0; 26.4; 26.5; 27.4; 28.3; 30.3; 30.7; 31.2; 31.7; 33.1; 35.6; 38.7; 41.7; 42.0; 42.9; 43.2; 43.5; 45.2; 48.3; 62.0 (OCH<sub>2</sub>); 66.4 (C-16); 69.9 (benzyl-OCH<sub>2</sub>); 71.3 (C-17'); 78.7 (C-17); 112.3 and 112.7 (C-2 and C-2'); 114.3 and 114.6 (C-4 and C-4'); 122.6 (C=C<sub>17</sub>); 126.6 and 126.9 (C-1 and C-1'); 127.4 (2C: C-2'' and C-6''); 127.8 (C-4''); 128.5 (2C: C-3'' and C-5''); 132.0 and 133.4 (C-10 and C-10'); 137.2 and 138.1 and 138.2 (C-1'' and C-5 and C-5'); 144.3 (C=C<sub>17</sub>); 156.1 and 156.8 (C-3 and C-3'). ESI-HRMS:  $m/z$ : 730.45668 [M+H]<sup>+</sup> (C<sub>47</sub>H<sub>60</sub>N<sub>3</sub>O<sub>4</sub> requires 730.45783 [M+H]<sup>+</sup>).

3-[[1-(3-benzyloxy-17 $\beta$ -hydroxy-13 $\alpha$ -estra-1,3,5(10)-trien-16 $\alpha$ -yl)-1H-1,2,3-triazol-4-yl]methoxy]-14 $\beta$ -propyl-des-D-estra-1,3,5(10)-trien-13 $\alpha$ -carbaldehyde oxime (13)

13 was obtained as a white solid (167 mg, 90%). Mp 108–110 °C,  $R_f$  = 0.73<sup>B</sup>. Anal. Calcd. For C<sub>47</sub>H<sub>58</sub>N<sub>4</sub>O<sub>4</sub>: C, 75.98; H, 7.87. Found: C, 76.04; H, 7.96. <sup>1</sup>H NMR  $\delta$  ppm (DMSO-*d*<sub>6</sub>): 0.83 (t, 3H,  $J$  = 6.8 Hz, 16a'-H<sub>3</sub>); 0.98 and 1.17 (2xs, 2x3H, 18-H<sub>3</sub> and 18'-H<sub>3</sub>); 2.72–2.80 (overlapping multiplets, 4H, 6-H<sub>2</sub> and 6'-H<sub>2</sub>); 3.92 (t, 1H,  $J$  = 6.3 Hz, 17-H); 4.84 (m, 1H, 16-H); 5.04 (s, 2H, benzyl-OCH<sub>2</sub>); 5.07 (m, 2H, OCH<sub>2</sub>); 5.26 (d, 1H,  $J$  = 5.6 Hz, OH); 6.68 and 6.73 (2xd, 2x1H,  $J$  = 2.2 Hz, 4-H and 4'-H); 6.77–6.79 (overlapping multiplets, 2H, 2-H and 2'-H); 7.14 and 7.19 (2xd, 2x1H,  $J$  = 8.6 Hz, 1-H and 1'-H); 7.18 (s, 1H, 17'-H), 7.31 (t, 1H,  $J$  = 7.3 Hz, 4''-H); 7.38 (t, 2H,  $J$  = 7.3 Hz, 3''- and 5''-H), 7.42 (d, 2H,  $J$  = 7.3 Hz, 2''- and 6''-H); 8.24 (s, 1H, C=CH); 10.38 (s, 1H, OH), <sup>13</sup>C NMR  $\delta$  ppm (DMSO-*d*<sub>6</sub>): 14.3 and 15.4 and 28.7 (C-16a' and C-18 and C-18'); 23.8; 25.6; 26.7; 27.1; 28.1, 28.2; 29.6; 29.8; 31.5; 32.0; 37.1; 37.5; 40.1; 40.5; 40.6; 41.7; 42.7; 46.9; 48.4; 60.9 (OCH<sub>2</sub>); 66.2 (C-16); 68.9 (benzyl-OCH<sub>2</sub>); 84.3 (C-17); 112.3 and 112.7 (C-2 and C-2'); 113.7 and 113.8 (C-4 and C-4'); 123.6 (C=C<sub>17</sub>); 126.3 and 127.3 (C-1 and C-1'); 127.4 (2C, C-2'' and C-6''); 127.6 (C-4''); 128.3 (2C, C-3'' and C-5''); 132.1 and 133.5 (C-10 and C-10'); 137.3 (2C) and 137.5 (C-1'' and C-5 and C-5').

5'); 142.5 ( $\text{C}=\text{CH}$ ); 155.8 and 155.9 (C-3 and C-3'); 157.8 (C-17'). ESI-HRMS:  $m/z$ : 743.45197  $[\text{M}+\text{H}]^+$  ( $\text{C}_{47}\text{H}_{59}\text{N}_4\text{O}_4$  requires 743.45308  $[\text{M}+\text{H}]^+$ ).

3-[[1-(3-benzyloxy-17 $\alpha$ -hydroxy-13 $\alpha$ -estra-1,3,5(10)-trien-16 $\beta$ -yl)-1H-1,2,3-triazol-4-yl]methoxy]-14 $\beta$ -propyl-des-D-estra-1,3,5(10)-trien-13 $\alpha$ -carbaldehyde oxime (**14**)

**14** was obtained as a white solid (165 mg, 89%). Mp 112–115 °C,  $R_f$  = 0.67<sup>B</sup>. Anal. Calcd. For  $\text{C}_{47}\text{H}_{58}\text{N}_4\text{O}_4$ : C, 75.98; H, 7.87. Found: C, 76.08; H, 7.95.  $^1\text{H}$  NMR  $\delta$  ppm (DMSO- $d_6$ ): 0.83 (t, 3H,  $J$  = 6.8 Hz, 16a'-H<sub>3</sub>); 0.98 (overlapping singlets, 2x3H, 18-H<sub>3</sub> and 18'-H<sub>3</sub>); 2.77 (overlapping multiplets, 4H, 6-H<sub>2</sub> and 6'-H<sub>2</sub>); 4.35 (m, 1H, 17-H); 4.85 (m, 1H, 16-H); 5.05 (overlapping singlets, 4H, 2xOCH<sub>2</sub>); 5.17 (m, 1H, OH); 6.71 (overlapping multiplets, 2H, 4-H and 4'-H); 6.77–6.80 (overlapping multiplets, 2H, 2-H and 2'-H); 7.17–7.24 (overlapping multiplets, 3H, 1-H, 17-H and 1'-H); 7.31 (t, 1H,  $J$  = 7.3 Hz, 4''-H); 7.38 (t, 2H,  $J$  = 7.3 Hz, 3''- and 5''-H); 7.42 (d, 2H,  $J$  = 7.3 Hz, 2''- and 6''-H); 8.21 (s, 1H,  $\text{C}=\text{CH}$ ), 10.37 (s, 1H, OH).  $^{13}\text{C}$  NMR  $\delta$  ppm (DMSO- $d_6$ ): 14.9, 16.0 and 23.4 (C-16a', C-18 and C-18'); 24.4; 26.2; 26.6; 27.3; 28.4; 30.4 (2C); 32.1; 32.6; 33.3; 37.7; 41.1; 41.2; 42.1; 42.8; 43.2; 43.3; 47.5; 48.0; 61.4 (OCH<sub>2</sub>); 66.0 (C-16); 69.5 (benzyl-OCH<sub>2</sub>); 77.6 (C-17); 112.9 and 113.0 (C-2 and C-2'); 114.5 and 114.8 (C-4 and C-4'); 124.8 ( $\text{C}=\text{CH}$ ); 126.9 and 127.3 (C-1 and C-1'); 127.9 (2C, C-2'' and C-6''); 128.1 (C-4''); 128.9 (2C, C-3'' and C-5''); 132.6 and 132.7 (C-10 and C-10'); 137.9 (2C) and 138.3 (C-5, C-5' and C-1''); 143.1 ( $\text{C}=\text{CH}$ ); 156.4 and 156.7 (C-3 and C-3'); 158.4 (C-17').

ESI-HRMS:  $m/z$ : 743.45188  $[\text{M}+\text{H}]^+$  ( $\text{C}_{47}\text{H}_{59}\text{N}_4\text{O}_4$  requires 743.45308  $[\text{M}+\text{H}]^+$ ).

$^1\text{H}$  and  $^{13}\text{C}$  NMR spectra of the heterodimers **11**–**14**

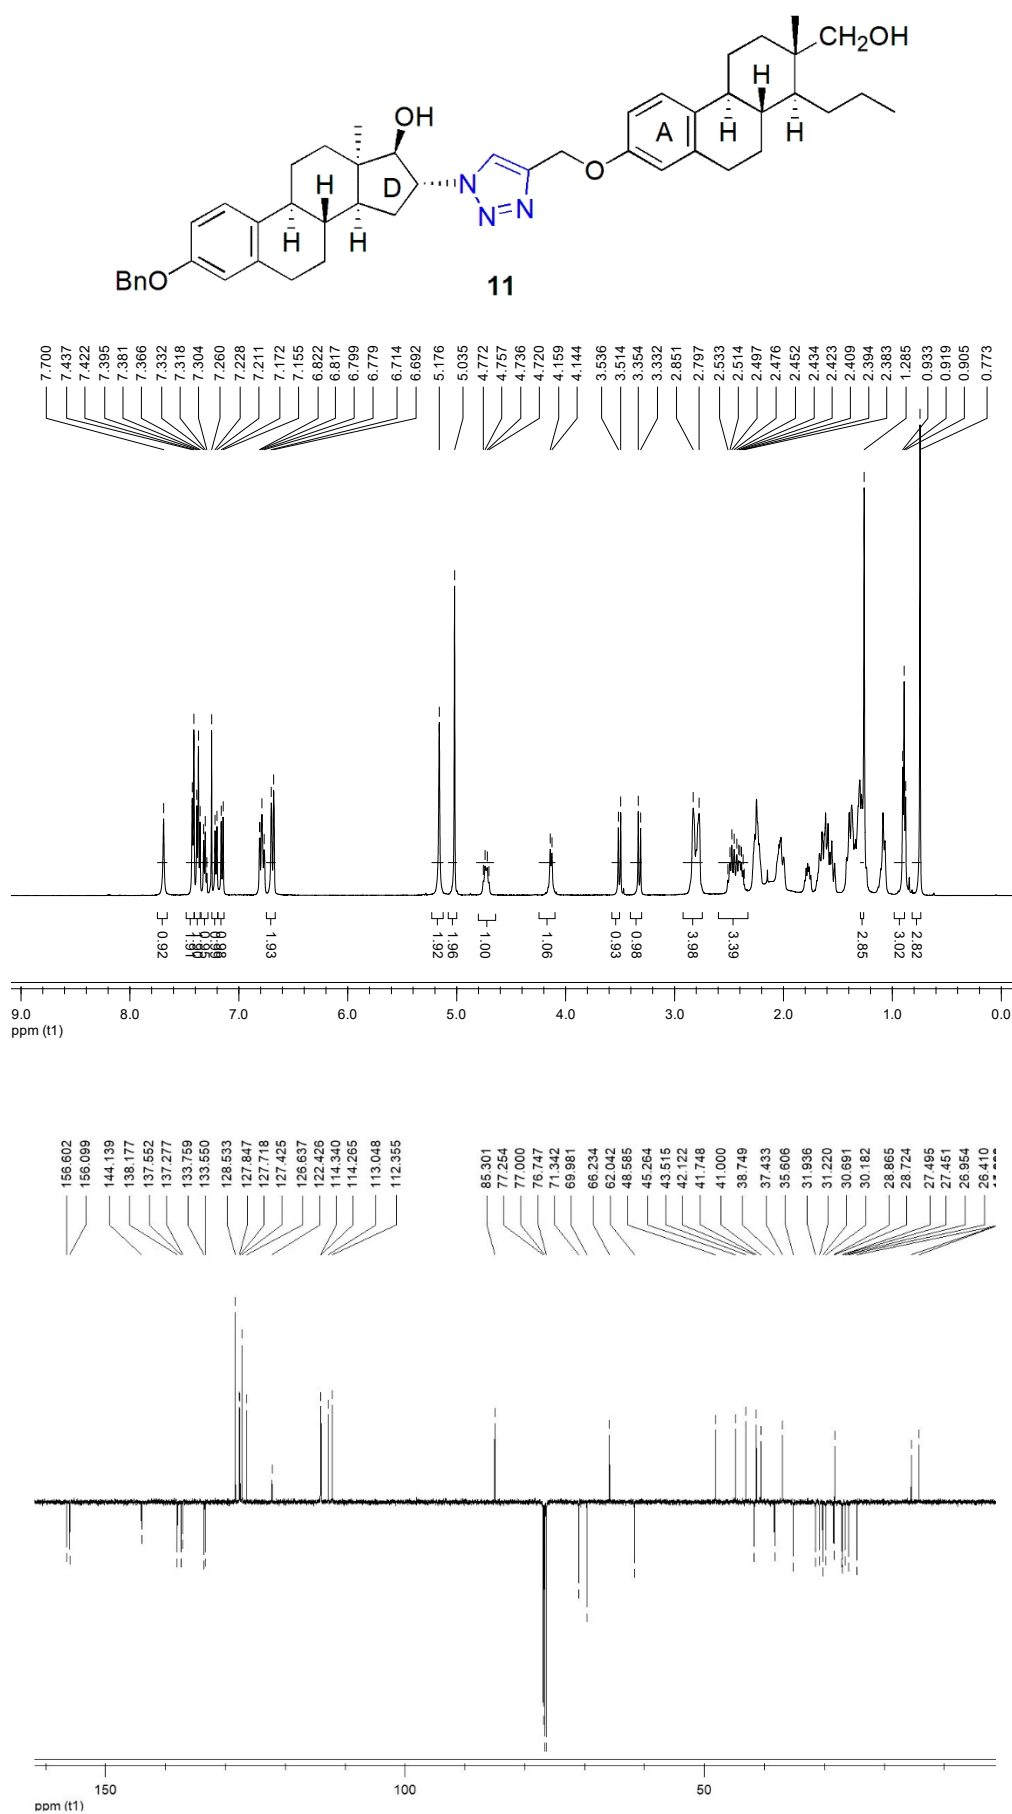

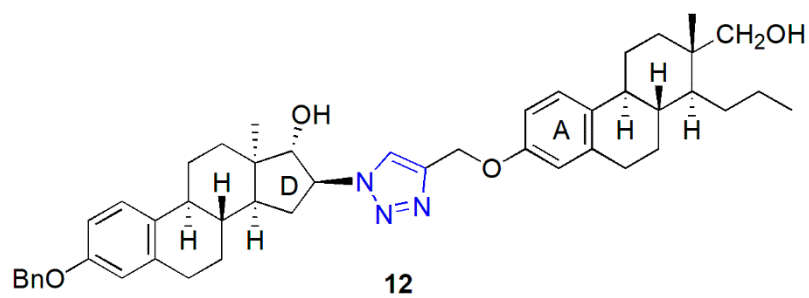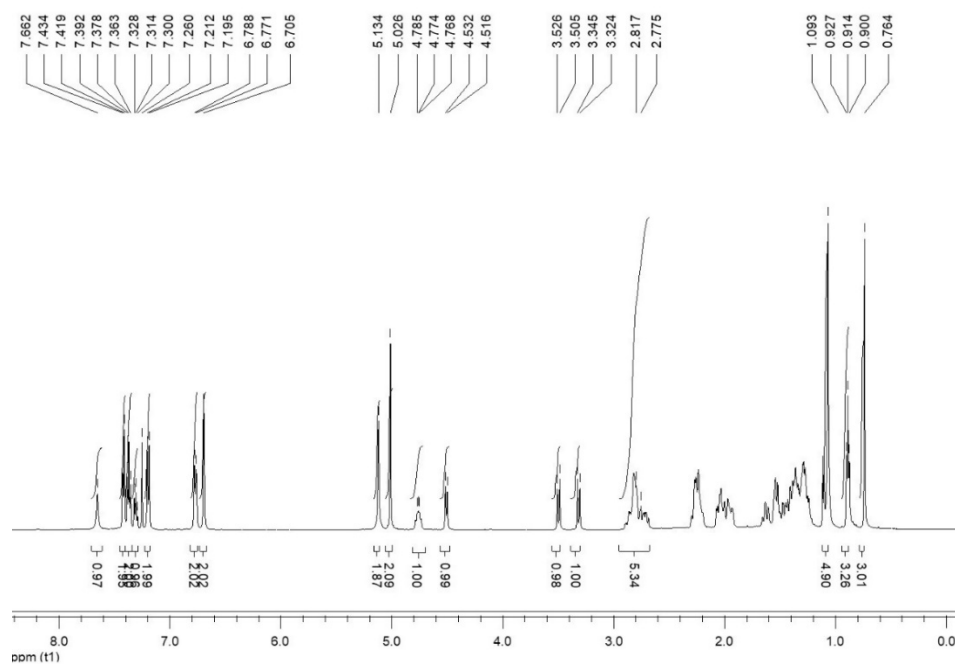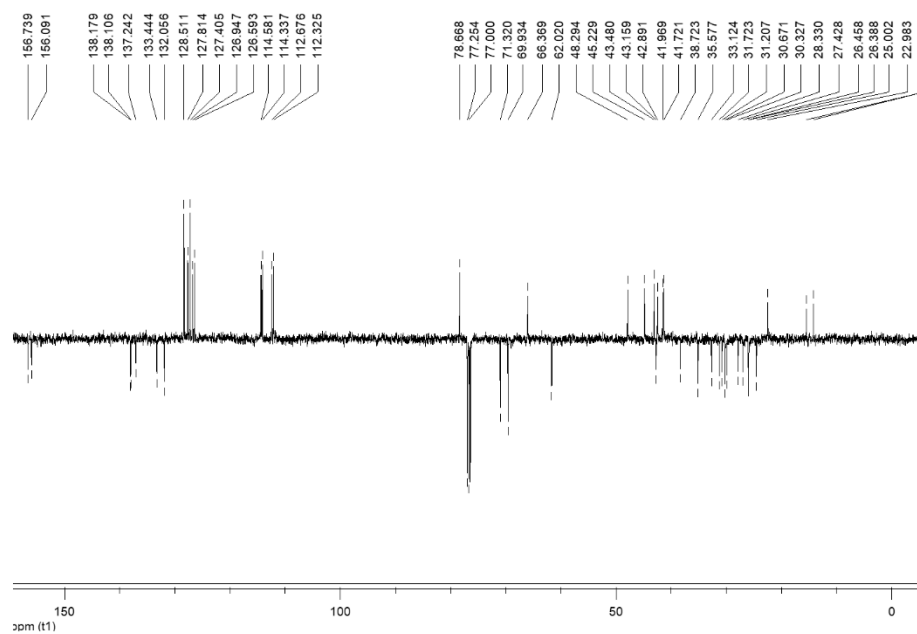

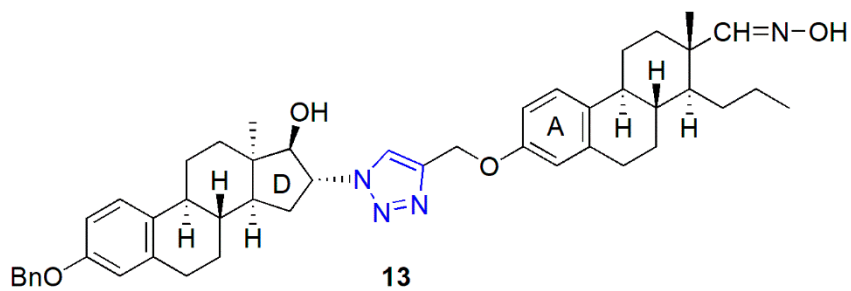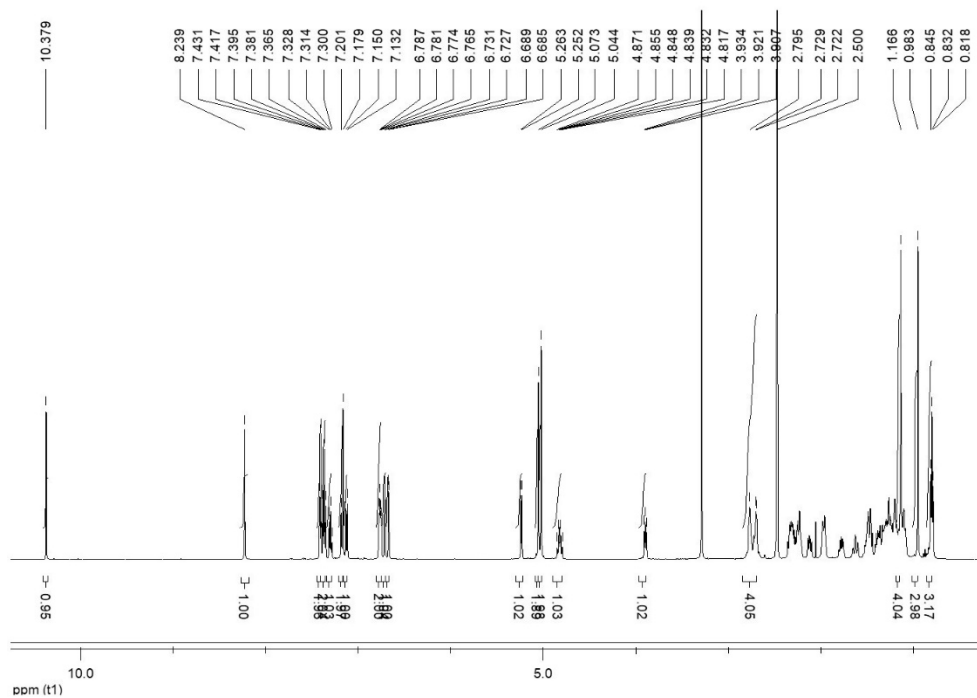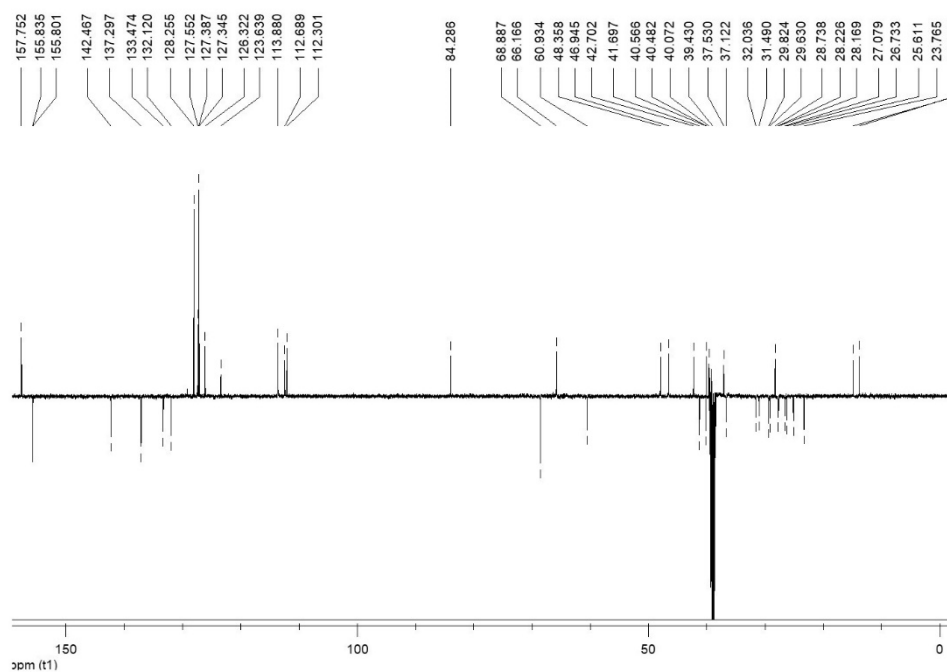

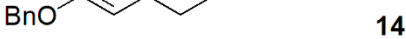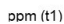

Figure S1. Ligand **12** in DMSO solution (a,) and water solution (b,)

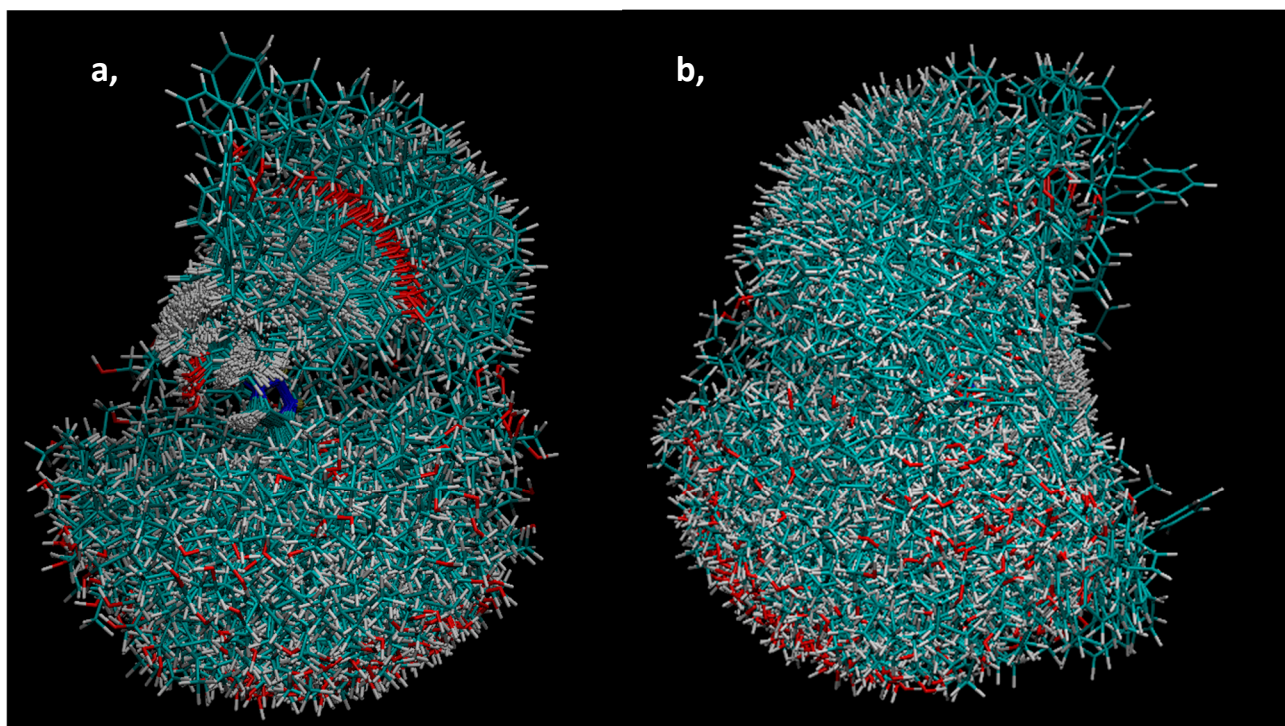

Figure S2. Ligand-Protein (LP) interactions along the 200 ns REST trajectory of compound **12** (closed sterane skeleton part in the binding pocket).

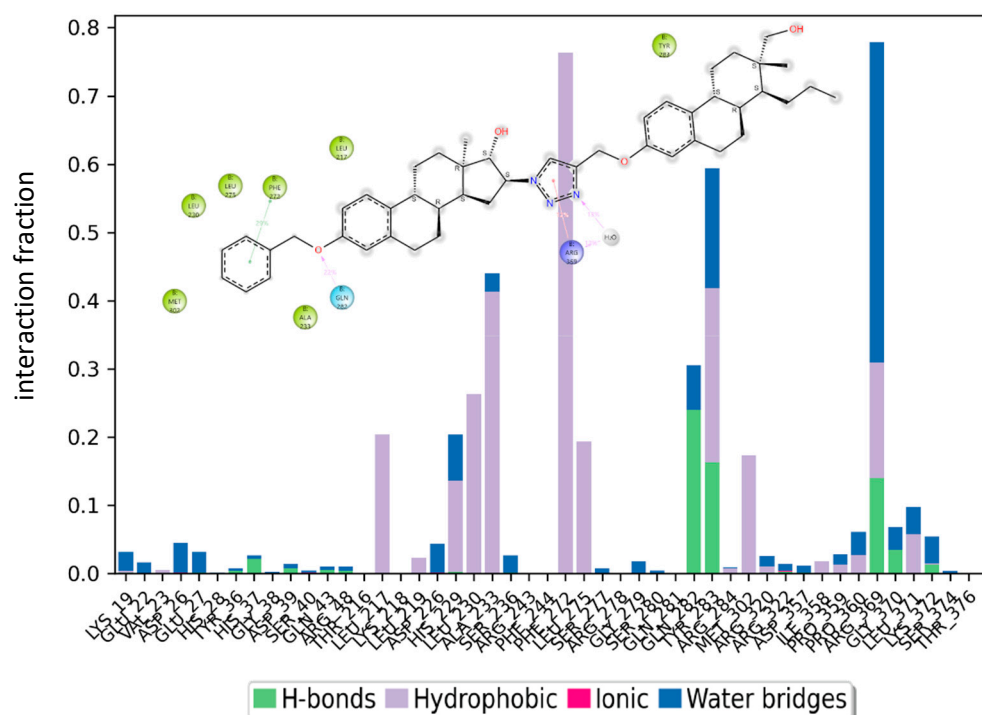



Figure S3. Ligand-Protein (LP) interactions along the 200 ns REST trajectory of compound **12** (open-steroid skeleton part in the binding pocket).

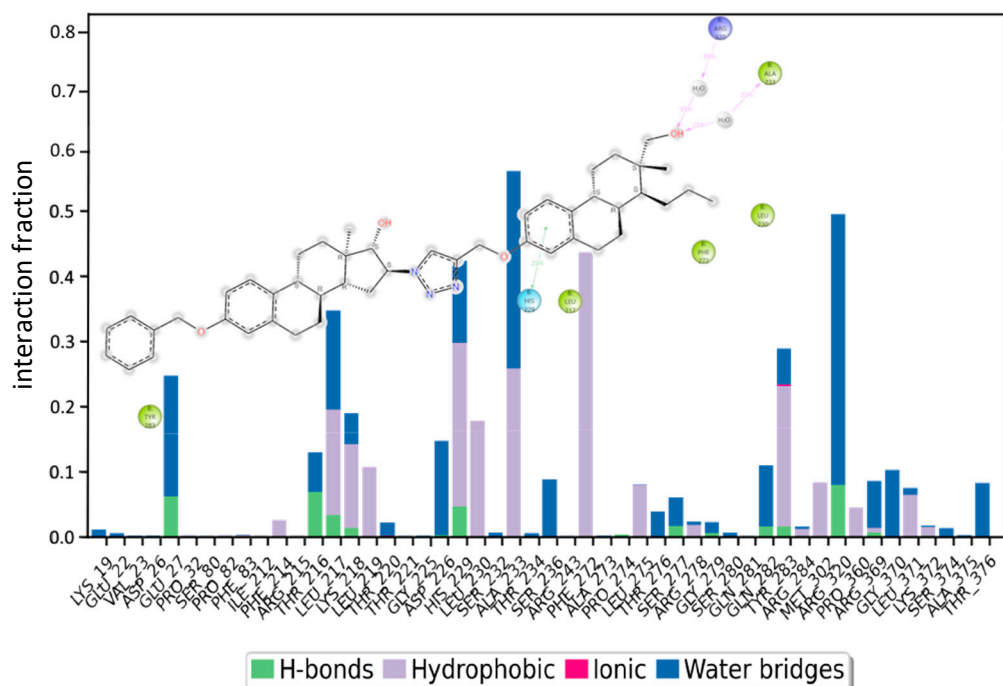

Supplement: s1 [file s1]
